# Supplementary material
Source: PubMed Central journal article supplement (PMC1553476)
Supplement: pcbi.0020075.sg002.pdf [file pcbi.0020075.sg002.pdf]

Figure S2

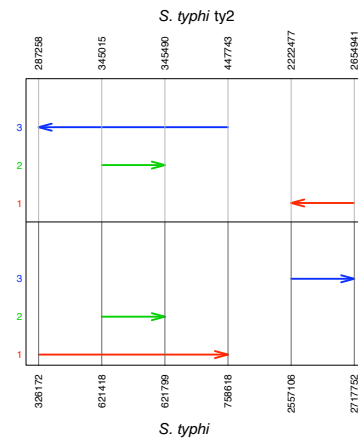

An example of a false KO anchor resulting from a nuisance cross overlap in the comparison of *S. typhi* ct18 and *S. typhi* ty2. Entry 2 (green) corresponds to K00357. By comparing it to Entries 1 and 3, it is easy to see that Entry 2 corresponds to a false anchor and is a nuisance cross overlap.
