# Supplementary material
Source: PubMed Central journal article supplement (PMC1553476)
Supplement: pcbi.0020075.st001.pdf [file pcbi.0020075.st001.pdf]

# Table S1

Running Mauve with default parameters on the 10 prokaryotic pairs as in Table 2 — (a) and (b) — and on the example run — (c). Size: genome size. LCB(#/cov.): #: number of locally-collinear blocks. cov.: coverage of LCB blocks (Mauve’s LCBs are comparable with MAGIC’s RFs). Backbone: coverage of backbone segments (Mauve’s Backbones are comparable with MAGIC’s positional orthologs). Identity: mean identity of all backbone segments Uni.: the result of the Rao uniformity test with 5% as critical value — ✓ accepting, - rejecting, and NA not applicable. The default value of some of the parameters are: The seed for calculating multi-MUMS equals  $seed\_size = \log_2(\frac{g_1+g_2}{2})/1.5$  (for the given genomes the  $seed\_size$  ranges between 12.8 and 15). The threshold for the gaps that are extracted from the alignments of collinear blocks for defining the “backbones” equals  $maxBackboneGapSize = 50$ , and the threshold for the length of backbone segments equals  $minBackboneSize = 50$ .

(a)

| Organism                     | Size    | LCB(#/cov.) | Backbone | Identity | Uni. |
|------------------------------|---------|-------------|----------|----------|------|
| <i>B. bronchiseptica</i>     | 5339179 | 210/0.75    | 0.69     | 0.99     | -    |
| <i>B. pertussis</i>          | 4086189 | 210/0.95    | 0.91     | 0.99     | -    |
| <i>H. pylori</i>             | 1667867 | 100/0.84    | 0.79     | 0.94     | -    |
| <i>H. pylori</i> j99         | 1643831 | 100/0.85    | 0.80     | 0.94     | -    |
| <i>N. meningitidis</i> a     | 2184406 | 248/0.92    | 0.89     | 0.97     | -    |
| <i>N. meningitidis</i> b     | 2272351 | 248/0.90    | 0.85     | 0.97     | -    |
| <i>S. typhi</i> ty2          | 4791961 | 104/0.93    | 0.90     | 0.98     | -    |
| <i>S. typhimurium</i>        | 4857432 | 104/0.94    | 0.89     | 0.98     | -    |
| <i>Y. pestis</i>             | 4653728 | 124/0.97    | 0.94     | 0.99     | -    |
| <i>Y. pseudotuberculosis</i> | 4744671 | 124/0.96    | 0.92     | 0.99     | -    |

(b)

| Organism                      | Size    | LCB(#/cov.) | Backbone | Identity | Uni. |
|-------------------------------|---------|-------------|----------|----------|------|
| <i>B. aphidicola</i> aps      | 640681  | 10/0.99     | 0.95     | 0.77     | ✓    |
| <i>B. aphidicola</i> sg       | 641454  | 10/0.99     | 0.95     | 0.77     | ✓    |
| <i>E. coli</i> mg1655         | 4639675 | 151/0.91    | 0.84     | 0.98     | -    |
| <i>S. flexneri</i> 2457t      | 4599354 | 151/0.92    | 0.84     | 0.98     | -    |
| <i>L. monocytogenes</i> egd-e | 2944528 | 82/0.98     | 0.89     | 0.88     | -    |
| <i>L. innocua</i>             | 3011208 | 82/0.92     | 0.87     | 0.88     | -    |
| <i>P. abyssi</i>              | 1765118 | 80/0.37     | 0.26     | 0.75     | -    |
| <i>P. horikoshii</i>          | 1738505 | 80/0.30     | 0.26     | 0.75     | -    |
| <i>S. pyogenes</i> m18        | 1895017 | 128/0.43    | 0.39     | 0.98     | -    |
| <i>S. pyogenes</i> ssi1       | 1894275 | 128/0.43    | 0.39     | 0.98     | -    |

(c)

| Organism                 | Size    | LCB(#/cov.) | Backbone | Identity | Uni. |
|--------------------------|---------|-------------|----------|----------|------|
| <i>S. flexneri</i> 2457t | 4599354 | 283/0.84    | 0.68     | 0.80     | -    |
| <i>S. typhi</i> ty2      | 4791961 | 283/0.81    | 0.65     | 0.80     | -    |
