# Supplementary material
Source: PubMed Central journal article supplement (PMC1553476)
Supplement: pcbi.0020075.st002.pdf [file pcbi.0020075.st002.pdf]

## Table S2

Running Mauve with non-default parameters on the 10 prokaryotic pairs as in Table 2— (a) and (b) — and on the example run — (c). Size: genome size. LCB(#/cov.): #: number of locally-collinear blocks. cov.: coverage of LCB blocks (Mauve’s LCB are comparable with MAGIC’s RFs). Backbone: coverage of backbone segments (Mauve’s Backbones are comparable with MAGIC’s Positional orthologs). Identity: mean identity of all backbone segments. Uni.: the result of the Rao uniformity test with 5% as critical value — ✓ accepting, - rejecting, and NA not applicable. The values of the changed parameters: The seed for calculating multi-MUMS is set to *seed\_size* = 11 (the value used in BLAST — MAGIC’s local alignment engine). The threshold for the gaps that are extracted from the alignments of collinear blocks for defining the “backbones” is set to *maxBackboneGapSize* = 200 (analogous to *gapExtractLen* used in Step 3 of MAGIC’s preprocessing phase), and the threshold for the length of backbone segments is set to *minBackboneSize* = 200.

(a)

| Organism                     | Size    | LCB(#/cov.) | Backbone | Identity | Uni. |
|------------------------------|---------|-------------|----------|----------|------|
| <i>B. bronchiseptica</i>     | 5339179 | 208/0.74    | 0.69     | 0.99     | -    |
| <i>B. pertussis</i>          | 4086189 | 208/0.95    | 0.91     | 0.99     | -    |
| <i>H. pylori</i>             | 1667867 | 134/0.93    | 0.91     | 0.94     | -    |
| <i>H. pylori</i> j99         | 1643831 | 134/0.94    | 0.92     | 0.94     | -    |
| <i>N. meningitidis</i> a     | 2184406 | 264/0.93    | 0.90     | 0.97     | -    |
| <i>N. meningitidis</i> b     | 2272351 | 264/0.92    | 0.87     | 0.97     | -    |
| <i>S. typhi</i> ty2          | 4791961 | 146/0.93    | 0.90     | 0.98     | -    |
| <i>S. typhimurium</i>        | 4857432 | 146/0.93    | 0.89     | 0.98     | -    |
| <i>Y. pestis</i>             | 4653728 | 123/0.97    | 0.94     | 0.99     | -    |
| <i>Y. pseudotuberculosis</i> | 4744671 | 123/0.96    | 0.92     | 0.99     | -    |

(b)

| Organism                      | Size    | LCB(#/cov.) | Backbone | Identity | Uni. |
|-------------------------------|---------|-------------|----------|----------|------|
| <i>B. aphidicola</i> aps      | 640681  | 90/0.97     | 0.95     | 0.75     | ✓    |
| <i>B. aphidicola</i> sg       | 641454  | 90/0.97     | 0.95     | 0.75     | ✓    |
| <i>E. coli</i> mg1655         | 4639675 | 188/0.91    | 0.84     | 0.98     | -    |
| <i>S. flexneri</i> 2457t      | 4599354 | 188/0.92    | 0.85     | 0.98     | -    |
| <i>L. monocytogenes</i> egd-e | 2944528 | 151/0.96    | 0.90     | 0.88     | -    |
| <i>L. innocua</i>             | 3011208 | 151/0.91    | 0.87     | 0.88     | -    |
| <i>P. abyssi</i>              | 1765118 | 307/0.84    | 0.75     | 0.73     | -    |
| <i>P. horikoshii</i>          | 1738505 | 307/0.81    | 0.75     | 0.73     | -    |
| <i>S. pyogenes</i> m18        | 1895017 | 147/0.95    | 0.92     | 0.98     | -    |
| <i>S. pyogenes</i> ss11       | 1894275 | 147/0.94    | 0.92     | 0.98     | -    |

(c)

| Organism                 | Size    | LCB(#/cov.) | Backbone | Identity | Uni. |
|--------------------------|---------|-------------|----------|----------|------|
| <i>S. flexneri</i> 2457t | 4599354 | 537/0.81    | 0.68     | 0.79     | -    |
| <i>S. typhi</i> ty2      | 4791961 | 537/0.75    | 0.66     | 0.79     | -    |
