# Supplementary material
Source: PubMed Central journal article supplement (PMC1553476)
Supplement: pcbi.0020075.st003.pdf [file pcbi.0020075.st003.pdf]

## Table S3

Comparing coverages between MAGIC’s (MG) results (Table 2 and example run) and Mauve’s (MV) results when run with non-default parameters (Table S2). Differences in RFs coverage: The genomic portion covered by Mauve’s LCBs but not by MAGIC’s RFs (MV-MG), and vice versa (MG-MV). Differences in PO: The genomic portion covered by Mauve’s Backbones but not by MAGIC’s Positional orthologs (MV-MG), and vice versa (MG-MV). Differences in PS (Positional orthologs & Selfish): The genomic portion covered by Mauve’s Backbones but not by MAGIC’s +Prophages column, *i.e.*, after adding Inparalogs, Transposable elements and Prophages to Positional orthologs (MV-MG), and vice versa (MG-MV). Compare to Table 3. Pairs in (a) and (b) are as in Table 2. (c) contains the results for the example run.

(a)

| Organism                     | Differences in RFs |        | Differences in PO |        | Differences in PS |       |
|------------------------------|--------------------|--------|-------------------|--------|-------------------|-------|
|                              | MV-MG              | MG-MV  | MV-MG             | MG-MV  | MV-MG             | MG-MV |
| <i>B. bronchiseptica</i>     | 0.033              | 0.0300 | 0.039             | 0.0046 | 0.036             | 0.036 |
| <i>B. pertussis</i>          | 0.043              | 0.0075 | 0.048             | 0.0048 | 0.043             | 0.033 |
| <i>H. pylori</i>             | 0.0031             | 0.032  | 0.017             | 0.023  | 0.014             | 0.040 |
| <i>H. pylori</i> j99         | 0.0047             | 0.030  | 0.017             | 0.023  | 0.015             | 0.028 |
| <i>N. meningitidis</i> a     | 0.0039             | 0.066  | 0.052             | 0.021  | 0.033             | 0.068 |
| <i>N. meningitidis</i> b     | 0.0150             | 0.050  | 0.052             | 0.025  | 0.029             | 0.066 |
| <i>S. typhi</i> ty2          | 0.0076             | 0.045  | 0.059             | 0.0090 | 0.045             | 0.044 |
| <i>S. typhimurium</i>        | 0.0025             | 0.064  | 0.061             | 0.0096 | 0.046             | 0.048 |
| <i>Y. pestis</i>             | 0.013              | 0.018  | 0.045             | 0.0041 | 0.027             | 0.051 |
| <i>Y. pseudotuberculosis</i> | 0.012              | 0.041  | 0.045             | 0.0070 | 0.040             | 0.016 |

(b)

| Organism                      | Differences in RFs |       | Differences in PO |        | Differences in PS |       |
|-------------------------------|--------------------|-------|-------------------|--------|-------------------|-------|
|                               | MV-MG              | MG-MV | MV-MG             | MG-MV  | MV-MG             | MG-MV |
| <i>B. aphidicola</i> aps      | 0.064              | 0.027 | 0.079             | 0.028  | 0.077             | 0.028 |
| <i>B. aphidicola</i> sg       | 0.064              | 0.028 | 0.083             | 0.026  | 0.082             | 0.027 |
| <i>E. coli</i> mg1655         | 0.0094             | 0.046 | 0.060             | 0.0024 | 0.035             | 0.039 |
| <i>S. flexneri</i> 2457t      | 0.0110             | 0.026 | 0.057             | 0.0026 | 0.033             | 0.099 |
| <i>L. monocytogenes</i> egd-e | 0.0026             | 0.034 | 0.063             | 0.0081 | 0.046             | 0.013 |
| <i>L. innocua</i>             | 0.0120             | 0.084 | 0.058             | 0.0100 | 0.038             | 0.064 |
| <i>P. abyssi</i>              | 0.011              | 0.053 | 0.038             | 0.035  | 0.037             | 0.040 |
| <i>P. horikoshii</i>          | 0.013              | 0.069 | 0.030             | 0.034  | 0.030             | 0.035 |
| <i>S. pyogenes</i> m18        | 0.013              | 0.030 | 0.15              | 0.0035 | 0.077             | 0.048 |
| <i>S. pyogenes</i> ssil       | 0.038              | 0.048 | 0.14              | 0.0016 | 0.017             | 0.060 |

(c)

| Organism                 | Differences in RFs |       | Differences in PO |       | Differences in PS |       |
|--------------------------|--------------------|-------|-------------------|-------|-------------------|-------|
|                          | MV-MG              | MG-MV | MV-MG             | MG-MV | MV-MG             | MG-MV |
| <i>S. flexneri</i> 2457t | 0.026              | 0.064 | 0.067             | 0.028 | 0.037             | 0.150 |
| <i>S. typhi</i> ty2      | 0.020              | 0.110 | 0.066             | 0.026 | 0.057             | 0.074 |
