# Supplementary material
Source: PubMed Central journal article supplement (PMC1553476)
Supplement: pcbi.0020075.st004.pdf [file pcbi.0020075.st004.pdf]

## Table S4

Running MAGIC while taking Mauve’s backbone results as anchors. Size: genome size. RF(#/cov.): #: number of RF segments. cov.: coverage of RF segments. PO: coverage of positional orthologous segments. +IP: adding inparalogs to the previous column. +Transposable: adding transposable elements to the previous column. +Prophages.: adding prophages as well as phagic elements to the previous column. Identity: mean identity of all positional orthologs. Uni.: the result of the Rao uniformity test with 5% as critical value — ✓accepting, - rejecting, and NA not applicable. Compare to Table 2. \* indicates that no prophage annotation was available for those species. Pairs in (a) and (b) are as in Table 2. (c) contains the results for the example run.

(a)

| Organism                     | Size    | RF(#/cov.) | PO   | +IP  | +Mobile DNA | +Prophages | Identity | Uni. |
|------------------------------|---------|------------|------|------|-------------|------------|----------|------|
| <i>B. bronchiseptica</i>     | 5339179 | 154/0.77   | 0.69 | 0.72 | 0.73        | 0.73       | 0.98     | ✓    |
| <i>B. pertussis</i>          | 4086189 | 154/0.94   | 0.90 | 0.91 | 0.93        | 0.93       | 0.98     | ✓    |
| <i>H. pylori</i>             | 1667867 | 38/0.96    | 0.92 | 0.92 | 0.93        | 0.93       | 0.93     | -    |
| <i>H. pylori</i> j99         | 1643831 | 38/0.97    | 0.93 | 0.94 | 0.94        | 0.94       | 0.93     | -    |
| <i>N. meningitidis</i> a     | 2184406 | 43/0.95    | 0.86 | 0.89 | 0.91        | 0.93       | 0.96     | -    |
| <i>N. meningitidis</i> b     | 2272351 | 43/0.90    | 0.83 | 0.86 | 0.87        | 0.89       | 0.96     | -    |
| <i>S. typhi</i> ty2          | 4791961 | 16/0.96    | 0.87 | 0.88 | 0.89        | 0.92       | 0.98     | ✓    |
| <i>S. typhimurium</i>        | 4857432 | 16/1       | 0.86 | 0.86 | 0.87        | 0.91       | 0.98     | ✓    |
| <i>Y. pestis</i>             | 4653728 | 43/0.97    | 0.90 | 0.90 | 0.94        | 0.97       | 0.98     | ✓    |
| <i>Y. pseudotuberculosis</i> | 4744671 | 43/0.98    | 0.89 | 0.89 | 0.90        | 0.90       | 0.98     | ✓    |

(b)

| Organism                      | Size    | RF(#/cov.) | PO   | +IP  | +Mobile DNA | +Prophages | Identity | Uni. |
|-------------------------------|---------|------------|------|------|-------------|------------|----------|------|
| <i>B. aphidicola</i> aps      | 640681  | 1/0.96     | 0.93 | 0.93 | 0.93        | 0.93       | 0.75     | NA   |
| <i>B. aphidicola</i> sg       | 641454  | 1/0.96     | 0.93 | 0.93 | 0.93        | 0.93       | 0.75     | NA   |
| <i>E. coli</i> mg1655         | 4639675 | 37/0.95    | 0.80 | 0.80 | 0.83        | 0.86       | 0.97     | ✓    |
| <i>S. flexneri</i> 2457t      | 4599354 | 37/0.93    | 0.80 | 0.80 | 0.88        | 0.92       | 0.98     | -    |
| <i>L. monocytogenes</i> egd-e | 2944528 | 17/0.99    | 0.85 | 0.85 | 0.85        | 0.88       | 0.87     | -    |
| <i>L. innocua</i>             | 3011208 | 17/0.96    | 0.83 | 0.84 | 0.84        | 0.91       | 0.87     | -    |
| <i>P. abyssii</i>             | 1765118 | 88/0.89    | 0.74 | 0.74 | 0.74        | 0.74       | 0.73     | -    |
| <i>P. horikoshii</i>          | 1738505 | 88/0.88    | 0.75 | 0.75 | 0.75        | 0.75       | 0.73     | -    |
| <i>S. pyogenes</i> m18        | 1895017 | 9/0.96     | 0.72 | 0.73 | 0.73        | 0.84       | 0.98     | ✓    |
| <i>S. pyogenes</i> ssi1       | 1894275 | 9/0.94     | 0.73 | 0.73 | 0.73        | 0.91       | 0.98     | ✓    |

(c)

| Organism                 | Size    | RF(#/cov.) | PO   | +IP  | +Mobile DNA | +Prophages | Identity | Uni. |
|--------------------------|---------|------------|------|------|-------------|------------|----------|------|
| <i>S. flexneri</i> 2457t | 4599354 | 104/0.85   | 0.64 | 0.65 | 0.75        | 0.79       | 0.79     | -    |
| <i>S. typhi</i> ty2      | 4791961 | 104/0.85   | 0.62 | 0.62 | 0.63        | 0.68       | 0.79     | -    |
