# Supplementary material
Source: PubMed Central journal article supplement (PMC1553476)
Supplement: pcbi.0020075.st005.pdf [file pcbi.0020075.st005.pdf]

## Table S5

The one-to-one RF table resulting from running MAGIC mapping phase and filtering entries of length smaller than 1,000,000 on the human-mouse chromosome X based on Blastz [12] chained output as available on UCSC Genome Browser [88].

| Human start | Human end | Human length | Mouse start | Mouse end | Mouse length | Relative orientation |
|-------------|-----------|--------------|-------------|-----------|--------------|----------------------|
| 10227017    | 23348357  | 13121341     | 150203850   | 164763696 | 14559847     | -                    |
| 23666963    | 37056699  | 13389737     | 73857342    | 89765185  | 15907844     | -                    |
| 37172328    | 46883793  | 9711466      | 7607865     | 19168557  | 11560693     | +                    |
| 48121741    | 51179489  | 3057749      | 4434617     | 6640987   | 2206371      | -                    |
| 52959550    | 54945113  | 1985564      | 145286858   | 147128844 | 1841987      | -                    |
| 62764225    | 114341839 | 51577615     | 90503075    | 142261509 | 51758435     | +                    |
| 114916468   | 154057927 | 39141460     | 19817790    | 70965293  | 51147504     | +                    |
